# Supplementary material for: Large-scale characterisation of the pregnancy vaginal microbiome and sialidase activity in a low-risk Chinese population
Source: PubMed Central journal article supplement (PMC8688454; doi:10.1038/s41522-021-00261-0), 2021-12-20
Supplement: 41522_2021_261_MOESM1_ESM.pdf [file 41522_2021_261_MOESM1_ESM.pdf]

## Supplementary Materials

### **Large-scale characterisation of the pregnancy vaginal microbiome and sialidase activity in a low-risk Chinese population**

Sherrienne Ng<sup>1,2+</sup>, Muxuan Chen<sup>3,4+</sup>, Samit Kundu<sup>1,2</sup>, Xuefei Wang<sup>5</sup>, Zuyi Zhou<sup>3,4</sup>, Zhongdaixi Zheng<sup>6</sup>, Wei Qing<sup>3,4</sup>, Huafang Sheng<sup>3,4</sup>, Yan Wang<sup>5</sup>, Yan He<sup>3,4</sup>, Phillip R. Bennett<sup>1,2</sup>, David A. MacIntyre<sup>1,2\*</sup> and Hongwei Zhou<sup>3,4,7\*</sup>.

Contains:

Supplementary Figures 1-7

Supplementary Tables 1-5

## Supplementary Figures

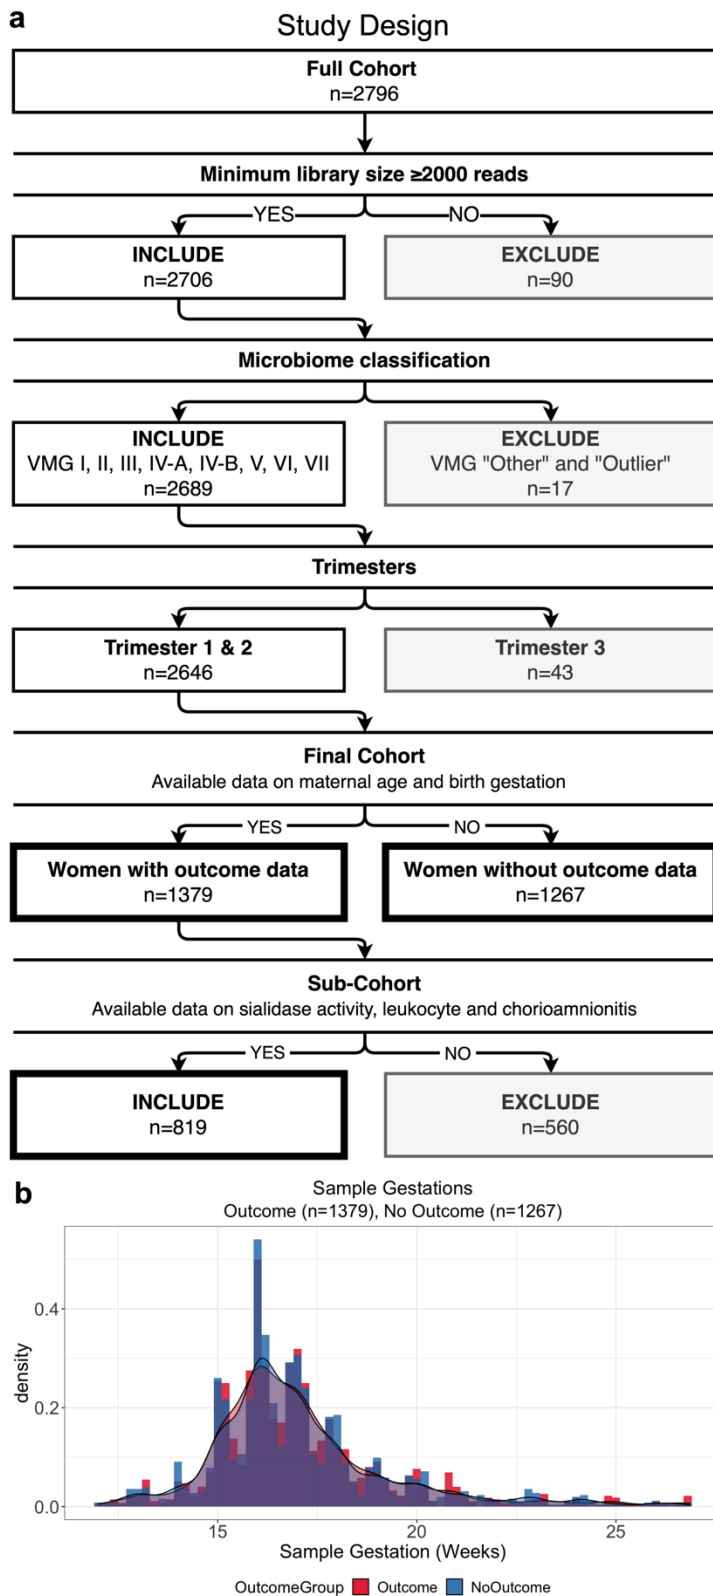

**Supplementary Figure 1.** (a) Study design of women included in final cohort analysis comparing women with and without outcome data and sub-cohort analysis of women with available maternal and neonatal data. (b) Density plot showing sample gestation of women with (red) and without (blue) outcome included in final cohort analysis.

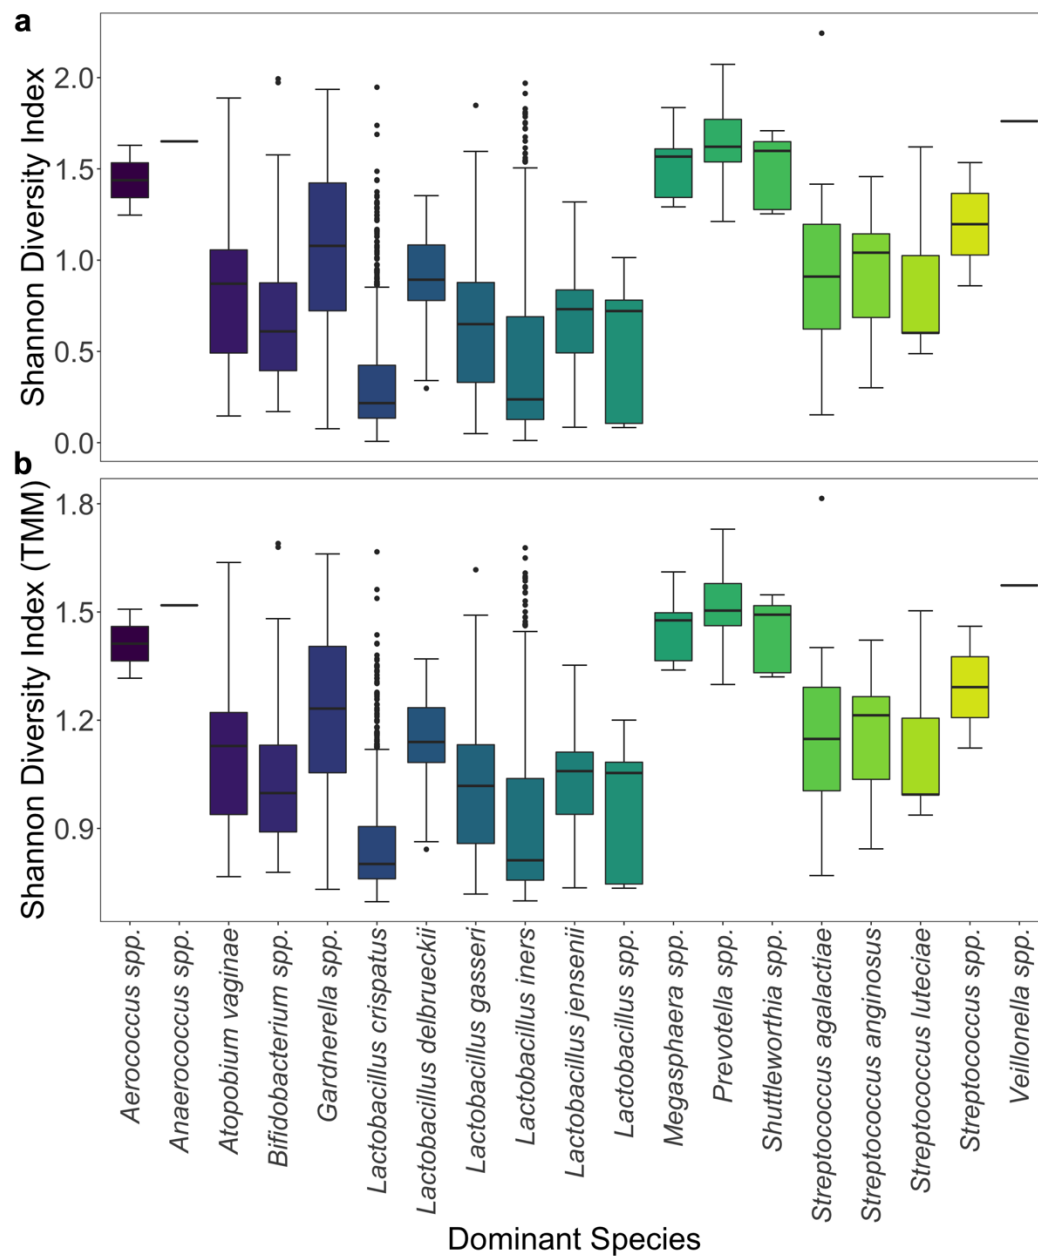

**Supplementary Figure 2.** Comparison of Shannon diversity index (a) before and (b) after trimmed mean of M-values (TMM) normalisation. The bounds of the box represent the first and third quartiles, centre line represents the median, and whiskers show min-to-max values.

### Vaginal Microbiome Groups

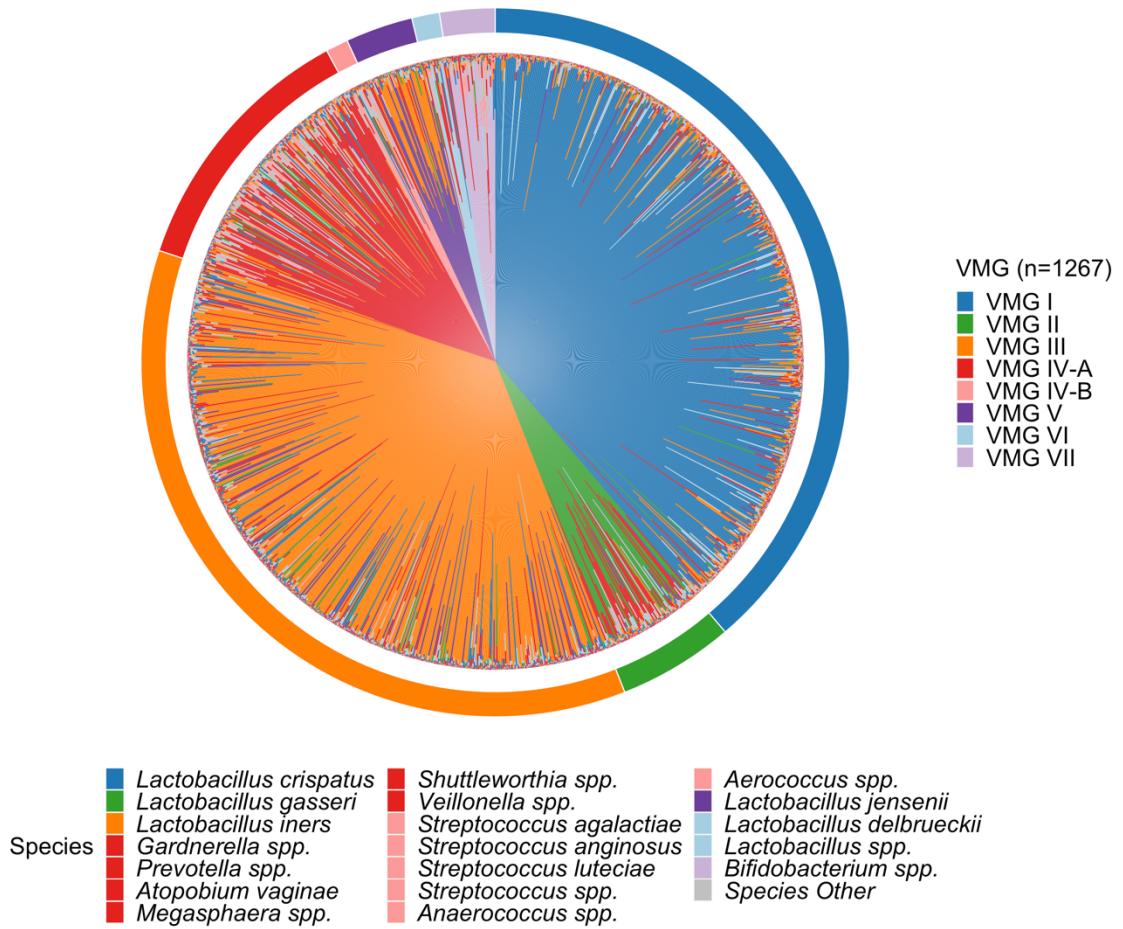

**Supplementary Figure 3.** Vaginal microbiome groups of women without outcome data. Radial plot showing vaginal microbiome groups (VMG) of women without outcome data. Species classified into VMG I (*L. crispatus* dominated, blue); II (*L. gasseri* dominated, green); III (*L. iners* dominated, orange); IV-A (BV-associated, red); IV-B (pathobionts, pink); V (*L. jensenii* dominated, purple); VI (Other *Lactobacillus*, light blue) and VII (*Bifidobacterium* dominated, light purple). Outcome data was defined as availability of maternal age and birth gestation.

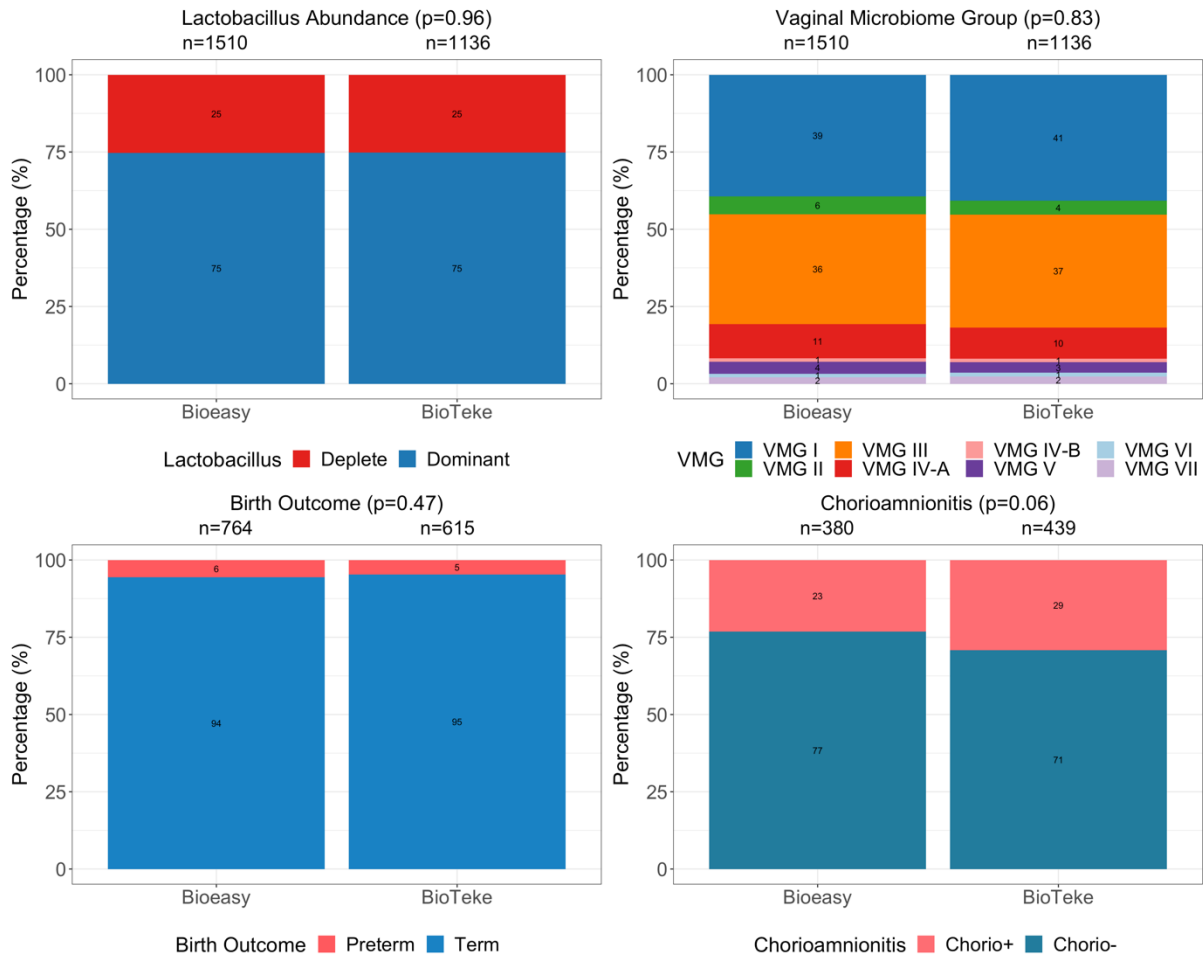

**Supplementary Figure 4.** Comparison of *Lactobacillus* abundance, VMG, birth outcome and chorioamnionitis proportions between samples extracted using manual (BioTeke) and automated (Bioeasy) DNA extraction kits. Statistical significance based on Fisher’s Exact Test.

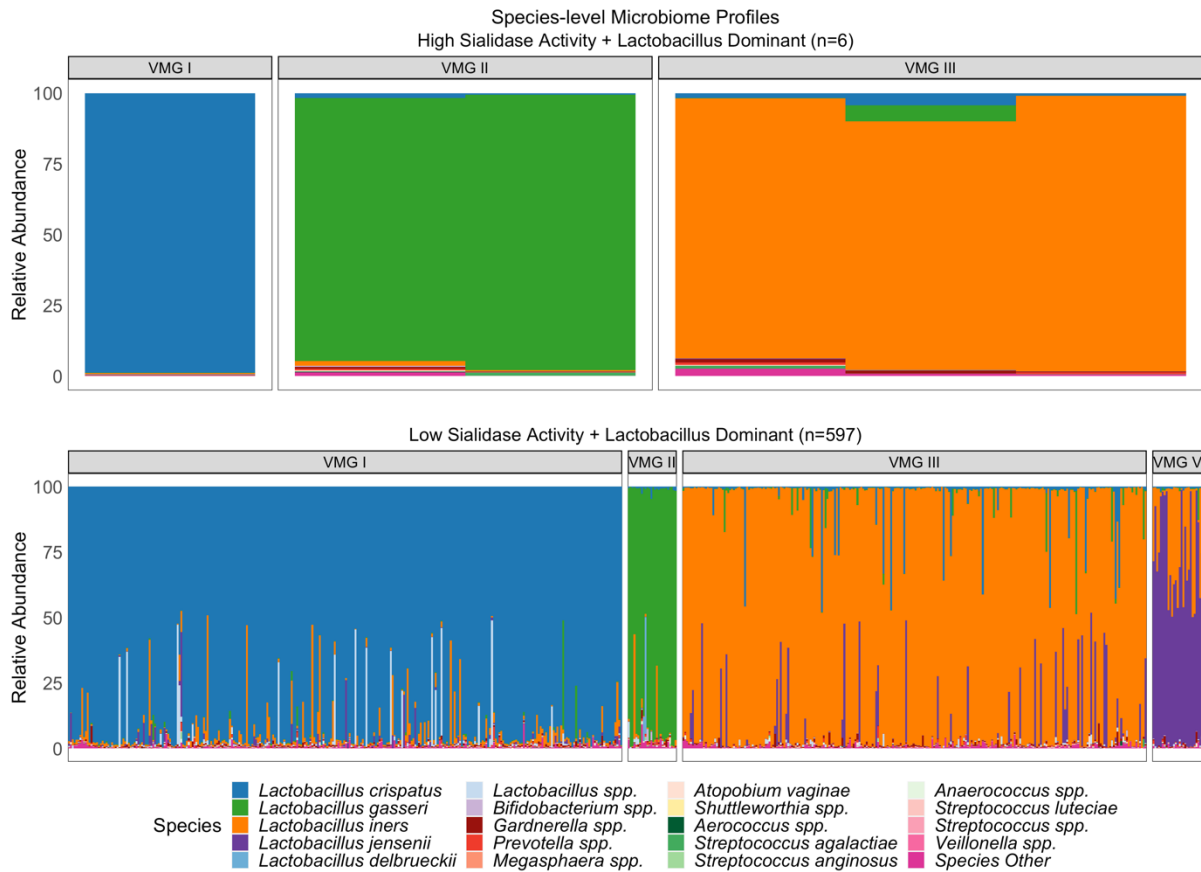

**Supplementary Figure 5.** *Lactobacillus* dominant microbiome profiles of women with high and low sialidase activity. The microbiome profiles of women with *Lactobacillus* dominance and high or low sialidase activity dominated by Vaginal Microbiome Group (VMG) I (*L. crispatus*, blue), II (*L. gasseri*, green), III (*L. iners*, orange) and/or V (*L. jensenii*, purple).

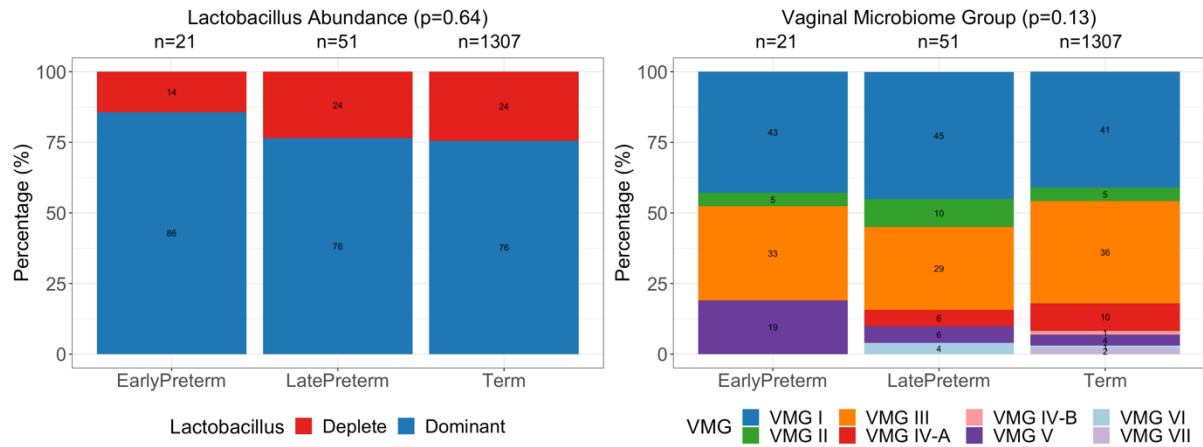

**Supplementary Figure 6.** Microbiome composition across early preterm, late preterm and term groups based on *Lactobacillus* abundance and vaginal microbiome groups (VMG). Statistical significance based on Fisher's Exact Test.

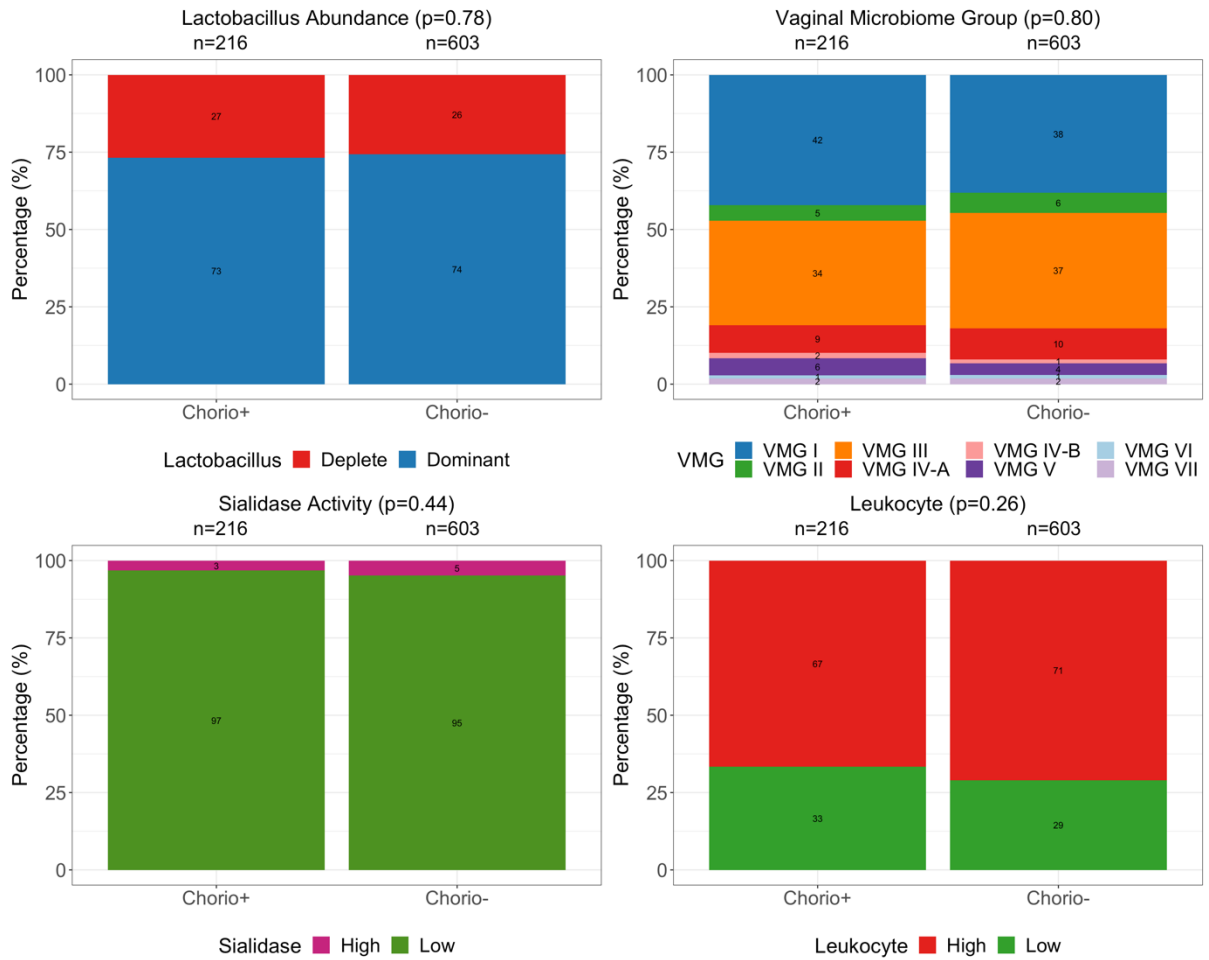

**Supplementary Figure 7.** Proportions of *Lactobacillus* abundance, VMG, sialidase activity and leukocyte wet mounts based on chorioamnionitis presence (Chorio+) and absence (Chorio-). Statistical significance based on Fisher's Exact Test.



## Supplementary Tables

**Supplementary Table 1.** Relative abundance and Shannon diversity index of dominant species groups.

| <b>Dominant Species Group</b>    | <b>Relative Abundance*</b> | <b>Shannon Diversity*</b> |
|----------------------------------|----------------------------|---------------------------|
| <i>Aerococcus_spp.</i>           | 46.12 (45.17 - 47.07)      | 1.44 (1.34 - 1.53)        |
| <i>Anaerococcus_spp.</i>         | 40.33 (40.33 - 40.33)      | 1.65 (1.65 - 1.65)        |
| <i>Atopobium_vaginae</i>         | 64.46 (50.76 - 89.92)      | 0.87 (0.49 - 1.06)        |
| <i>Bifidobacterium_spp.</i>      | 86.9 (73.01 - 92.94)       | 0.61 (0.39 - 0.88)        |
| <i>Gardnerella_spp.</i>          | 58.25 (45.40 - 79.30)      | 1.08 (0.72 - 1.42)        |
| <i>Lactobacillus_crispatus</i>   | 96.37 (90.35 - 97.97)      | 0.22 (0.13 - 0.42)        |
| <i>Lactobacillus_delbrueckii</i> | 71.08 (56.64 - 75.03)      | 0.89 (0.78 - 1.08)        |
| <i>Lactobacillus_gasseri</i>     | 83.73 (63.89 - 93.95)      | 0.65 (0.33 - 0.88)        |
| <i>Lactobacillus_iners</i>       | 96.19 (76.41 - 98.14)      | 0.24 (0.13 - 0.69)        |
| <i>Lactobacillus_jensenii</i>    | 66.31 (56.38 - 89.41)      | 0.73 (0.49 - 0.84)        |
| <i>Lactobacillus_spp.</i>        | 75.58 (54.30 - 98.53)      | 0.72 (0.11 - 0.78)        |
| <i>Megasphaera_spp.</i>          | 35.92 (32.73 - 41.48)      | 1.57 (1.34 - 1.61)        |
| <i>Prevotella_spp.</i>           | 39.48 (35.63 - 46.25)      | 1.62 (1.54 - 1.77)        |
| <i>Shuttleworthia_spp.</i>       | 39.60 (33.78 - 50.54)      | 1.60 (1.28 - 1.65)        |
| <i>Streptococcus_agalactiae</i>  | 75.90 (60.45 - 85.59)      | 0.91 (0.62 - 1.20)        |
| <i>Streptococcus_anginosus</i>   | 69.50 (51.10 - 86.81)      | 1.04 (0.69 - 1.14)        |
| <i>Streptococcus_luteciae</i>    | 87.11 (61.32 - 88.65)      | 0.60 (0.60 - 1.03)        |
| <i>Streptococcus_spp.</i>        | 45.29 (42.93 - 47.65)      | 1.20 (1.03 - 1.37)        |
| <i>Veillonella_spp.</i>          | 35.87 (35.87 - 35.87)      | 1.76 (1.76 - 1.76)        |

\*Median (IQR)

**Supplementary Table 2.** Vaginal microbiome groups (VMG) of women with and without outcome data.

| <b>VMG</b>                              | <b>Women with available outcome data*</b> | <b>Women without available outcome data*</b> |
|-----------------------------------------|-------------------------------------------|----------------------------------------------|
| I ( <i>L. crispatus</i> dominated)      | 567 (41.12%)                              | 491 (38.75%)                                 |
| II ( <i>L. gasseri</i> dominated)       | 70 (5.08%)                                | 67 (5.29%)                                   |
| III ( <i>L. iners</i> dominated)        | 495 (35.90%)                              | 457 (36.07%)                                 |
| IV-A (BV-associated)                    | 130 (9.43%)                               | 152 (12.00%)                                 |
| IV-B (Non-BV taxa)                      | 18 (1.31%)                                | 13 (1.03%)                                   |
| V ( <i>L. jensenii</i> dominated)       | 57 (4.13%)                                | 39 (3.08%)                                   |
| VI (Other <i>Lactobacillus</i> )        | 16 (1.16%)                                | 16 (1.26%)                                   |
| VII ( <i>Bifidobacterium</i> dominated) | 26 (1.89%)                                | 32 (2.53%)                                   |
| <b>Total</b>                            | <b>1379</b>                               | <b>1267</b>                                  |

\*number (%)

**Supplementary Table 3.** Relative abundance of *Lactobacillus*, *Bifidobacterium* and BV-type species in women with high or low sialidase activity.

| <b>Genus</b>    | <b>High sialidase activity*</b> | <b>Low sialidase activity*</b> | <b>p-value**</b> |
|-----------------|---------------------------------|--------------------------------|------------------|
| Atopobium       | 1.14 (0.09 - 7.04)              | 0.09 (0.04 - 0.19)             | p<0.01           |
| Bifidobacterium | 0.00 (0.00 - 0.03)              | 0.00 (0.00 - 0.00)             | p>0.05           |
| Clostridium     | 0.00 (0.00 - 0.02)              | 0.00 (0.00 - 0.00)             | p<0.05           |
| Gardnerella     | 37.99 (9.75 - 61.31)            | 0.34 (0.20 - 0.73)             | p<0.01           |
| Lactobacillus   | 29.28 (3.19 - 74.68)            | 98.44 (93.92 - 99.17)          | p<0.01           |
| Megasphaera     | 0.06 (0.00 - 11.62)             | 0.00 (0.00 - 0.06)             | p<0.01           |
| Prevotella      | 0.98 (0.06 - 10.14)             | 0.13 (0.05 - 0.33)             | p<0.01           |

\*Median (IQR)

\*\*Mann-Whitney Test

**Supplementary Table 4.** Birth gestation of women based on *Lactobacillus* abundance, sialidase activity and leukocyte wet mount results. No difference in mean gestation at birth was detected between any of the assessed contrasts (Mann-Whitney test).

| Lactobacillus Abundance |          | Sialidase Activity |     | Leukocyte Wet Mounts |       | Birth Gestation (Weeks)* |
|-------------------------|----------|--------------------|-----|----------------------|-------|--------------------------|
| Deplete                 | Dominant | High               | Low | Leuk+                | Leuk- |                          |
| x                       |          | x                  |     | x                    |       | 39.86<br>(39.29 - 40.50) |
|                         | x        | x                  |     | x                    |       | 39.14<br>(36.36 - 39.96) |
| x                       |          |                    | x   | x                    |       | 39.43<br>(38.71 - 40.14) |
|                         | x        |                    | x   | x                    |       | 39.43<br>(38.71 - 40.14) |
| x                       |          | x                  |     |                      | x     | 38.86<br>(38.25 - 39.32) |
|                         | x        | x                  |     |                      | x     | 39.64<br>(39.61 - 39.68) |
| x                       |          |                    | x   |                      | x     | 39.29<br>(39.00 - 40.14) |
|                         | x        |                    | x   |                      | x     | 39.29<br>(38.57 - 40.14) |

\*Median (IQR)

**Supplementary Table 5.** Logistic regression analysis of women in subcohort (n=819) to determine contribution of *Lactobacillus* abundance, sialidase activity and leukocyte wet mount result to birth outcome.

| <b>Independent variable</b>                            | <b>Logistic regression coefficient</b> | <b>Standard error</b> | <b>p-value</b> | <b>Log-odds</b> |
|--------------------------------------------------------|----------------------------------------|-----------------------|----------------|-----------------|
| Lactobacillus Abundance<br>(Deplete = 1, Dominant = 0) | -0.09                                  | 0.37                  | 0.81           | 0.92            |
| Sialidase Activity<br>(High = 1, Low = 0)              | 0.50                                   | 0.66                  | 0.45           | 1.65            |
| Leukocyte<br>(High = 1, Low = 0)                       | -0.13                                  | 0.33                  | 0.69           | 0.88            |
